# Supplementary material
Source: Springer Nature journal article supplement (https://www.springermedizin.de/resource/supplementary/13012_2011_579_MOESM1_ESM.pdf/9630020)
Supplement: MOESM1 [file 9630020]

## Additional file 1: Glossary

|            |                                                                                                                                                                                                                       |
|------------|-----------------------------------------------------------------------------------------------------------------------------------------------------------------------------------------------------------------------|
| Category   | A term used informally in the review to describe any grouping of constructs within a domain.                                                                                                                          |
| Construct  | Concept(s) or characteristic(s) that cannot be directly observed. Construct refers to both the concept that an instrument is designed to measure, and concepts in a theory. [1-2]                                     |
| Dimension  | A unique aspect of a construct. Constructs may have a single dimension or may be multidimensional. The dimensions of a construct should be predicted by theory and confirmed empirically. [3]                         |
| Domain     | A broad grouping of constructs, which together form the components of a theory or a defined area of interest. [4]                                                                                                     |
| Instrument | The combination of items used to measure one or more constructs. The instrument may or may not consist of stand-alone scales each measuring unique constructs (or subscales measuring dimensions of a construct). [1] |
| Item       | A single question or statement used to measure a construct. Includes the item stem and response options. [2]                                                                                                          |
| Scale      | The set of items that measure a single underlying characteristic. These characteristics are either unique constructs or unique dimensions of a construct. [5]                                                         |

### References

1. Gliner JA, Morgan GA, NetLibrary Inc.: *Research methods in applied settings an integrated approach to design and analysis*. Mahwah, N.J.: Lawrence Erlbaum; 2000.
2. Joint Committee on Standards for Educational and Psychological Testing (U.S.), American Educational Research Association., American Psychological Association., Education. NCoMi: *Standards for educational and psychological testing*. Washington, DC: American Educational Research Association; 1999.
3. Di Iorio CK: *Measurement in health behavior: methods for research and education*. 1st edn. San Francisco: Jossey-Bass; 2005.
4. Miner JB: *Organizational Behavior 1 : Essential Theories of Motivation and Leadership*. Armonk: M.E. Sharpe Inc.; 2005.
5. Streiner DL, Norman GR: *Health measurement scales: a practical guide to their development and use*. 3rd edn. Oxford ; New York: Oxford University Press; 2003.
